# Supplementary material for: Design of bisamide inhibitors of the TASK-1 potassium channel in silico
Source: Royal Society of Chemistry journal article supplement (doi:10.1039/d4cp03521f), 2024-12-09
Supplement: d4cp03521f2.pdf [file d4cp03521f2.pdf]

Figure S1 Activity values of bis-amide derivatives against TASK-1 and TASK-3.

| No. | Chemical Structures<br>R <sup>1</sup> | Inhibitory Activity (IC <sub>50</sub> (μM)) |        |
|-----|---------------------------------------|---------------------------------------------|--------|
|     |                                       | TASK-1                                      | TASK-3 |
|     |                                       |                                             |        |
| 1   |                                       | 0.027                                       | 0.50   |
| 2   |                                       | 0.10                                        | 6.5    |
| 3   |                                       | >3                                          | >30    |
| 4   |                                       | 0.021                                       | 23     |
| 5   |                                       | 0.22                                        | 1.5    |
| 6   |                                       | 0.33                                        | 4.3    |
| 7   |                                       | >3                                          | 2.1    |
| 8   |                                       | 0.045                                       | >30    |
| 9   |                                       | 0.31                                        | 20     |
| 10  |                                       | 0.50                                        | 7.1    |

|    |                                                                                     |       |      |
|----|-------------------------------------------------------------------------------------|-------|------|
| 11 | 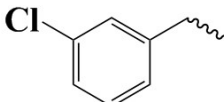   | 0.052 | 2.4  |
| 12 |    | >3    | >30  |
| 13 |    | 0.13  | 2.5  |
| 14 |    | 0.16  | >30  |
| 15 |    | >3    | >30  |
| 16 |   | >3    | 3.2  |
| 17 |  | 0.26  | >30  |
| 18 |  | 0.037 | 5.9  |
| 19 |  | 0.80  | 25   |
| 20 |  | 0.029 | 0.97 |
| 21 |  | 0.16  | 5.6  |
| 22 |  | 0.086 | 2.5  |

|    |                                                                                   |       |      |
|----|-----------------------------------------------------------------------------------|-------|------|
| 23 | 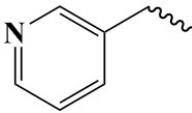 | 1.29  | >30  |
| 24 |  | 0.25  | >30  |
| 25 |  | 0.079 | 5.48 |

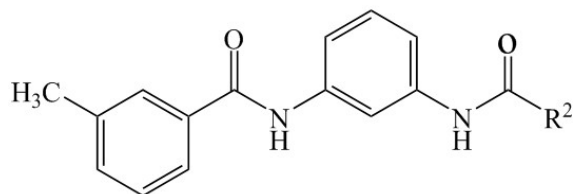

| No. | Chemical Structures                                                                 | Inhibitory Activity (IC <sub>50</sub> (μM) ) |        |
|-----|-------------------------------------------------------------------------------------|----------------------------------------------|--------|
|     |                                                                                     | TASK-1                                       | TASK-3 |
| 26  | 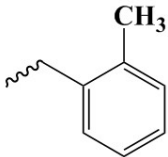  | 0.091                                        | 0.96   |
| 27  |  | 0.030                                        | 0.15   |
| 28  |  | 0.33                                         | 1.7    |
| 29  |  | 0.19                                         | >30    |
| 30  |  | 0.004                                        | 0.39   |
| 31  |  | 0.031                                        | 2.2    |
| 32  |  | 1.3                                          | >30    |

|    |                                                                                     |       |      |
|----|-------------------------------------------------------------------------------------|-------|------|
| 33 | 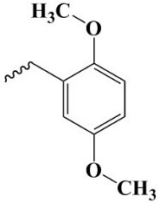   | 0.15  | 2.3  |
| 34 |    | 0.009 | 0.41 |
| 35 |    | 0.029 | 0.75 |
| 36 |   | 0.21  | 2.7  |
| 37 |  | 0.023 | 1.34 |
| 38 |  | 0.003 | 0.48 |
| 39 |  | 0.15  | >30  |
| 40 |  | 0.025 | 0.60 |
| 41 |  | 0.014 | 1.4  |
| 42 |  | 0.010 | 5.5  |

| 43  | 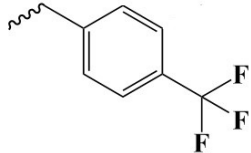   | >3                                                                                  | >30                                         |        |
|-----|-------------------------------------------------------------------------------------|-------------------------------------------------------------------------------------|---------------------------------------------|--------|
| 44  |    | 0.15                                                                                | >30                                         |        |
| 45  |    | 0.14                                                                                | 2.7                                         |        |
| 46  |    | 0.005                                                                               | 0.33                                        |        |
| 47  |    | 0.095                                                                               | >30                                         |        |
|     |   |                                                                                     |                                             |        |
| No. | Chemical Structures                                                                 |                                                                                     | Inhibitory Activity (IC <sub>50</sub> (μM)) |        |
|     | R <sup>1</sup>                                                                      | R <sup>2</sup>                                                                      | TASK-1                                      | TASK-3 |
| 48  |  |  | 0.010                                       | 1.88   |
| 49  |  |  | 0.004                                       | 0.41   |
| 50  |  |  | 0.002                                       | 0.066  |

|    |                                                                                     |                                                                                     |       |      |
|----|-------------------------------------------------------------------------------------|-------------------------------------------------------------------------------------|-------|------|
| 51 | 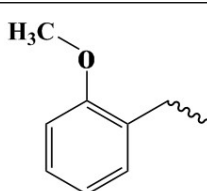   |    | 0.073 | 2.2  |
| 52 |    |    | 0.007 | 1.0  |
| 53 |    |    | 0.011 | 0.73 |
| 54 |   |   | 0.001 | 0.11 |
| 55 |  |  | 0.002 | 0.31 |
| 56 |  |  | 0.18  | 2.43 |

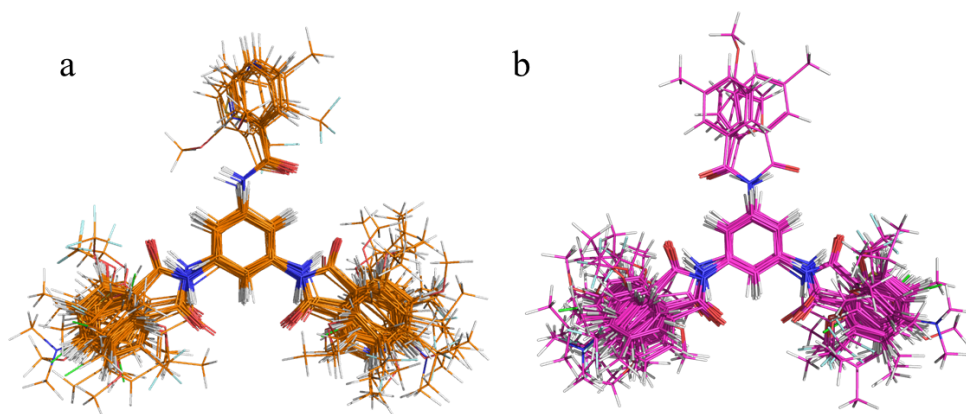

Figure S1. a, b are the molecular superimposition diagrams of models TASK-1 (orange) and TASK-3 (magenta), respectively

Figure S2. Prediction of molecular activity values.

| No. | Compound      | TASK-1                 |                                   | TASK-3                 |                                   |
|-----|---------------|------------------------|-----------------------------------|------------------------|-----------------------------------|
|     |               | Affinity<br>(kcal/mol) | pIC <sub>50</sub><br>(prediction) | Affinity<br>(kcal/mol) | pIC <sub>50</sub><br>(prediction) |
| 1   | Molecule 47   | -10.1                  | 7.6296                            | -10.2                  | 6.0816                            |
| 2   | Molecule 146  | -10.1                  | 7.452                             | -10.1                  | 4.2919                            |
| 3   | Molecule 170  | -10.2                  | 7.4103                            | -9.7                   | 5.5788                            |
| 4   | Molecule 223  | -10.2                  | 6.729                             | -10.3                  | 5.244                             |
| 5   | Molecule 248  | -10.2                  | 7.5322                            | -10.6                  | 6.4324                            |
| 6   | Molecule 296  | -11.5                  | 7.3151                            | -11.4                  | 5.3488                            |
| 7   | Molecule 307  | -10.1                  | 7.3376                            | -10.3                  | 5.1009                            |
| 8   | Molecule 351  | -10.0                  | 6.2521                            | -10.2                  | 5.7156                            |
| 9   | Molecule 359  | -10.0                  | 7.2641                            | -9.7                   | 5.3939                            |
| 10  | Molecule 398  | -10.1                  | 7.6574                            | -10.1                  | 5.5559                            |
| 11  | Molecule 456  | -10.4                  | 6.5356                            | -10.6                  | 5.4896                            |
| 12  | Molecule 472  | -10.2                  | 7.6376                            | -10.5                  | 5.0062                            |
| 13  | Molecule 551  | -10.3                  | 7.3672                            | -10.6                  | 5.3357                            |
| 14  | Molecule 563  | -10.0                  | 7.404                             | -10.0                  | 5.7323                            |
| 15  | Molecule 613  | -120.                  | 7.2252                            | -11.7                  | 5.3428                            |
| 16  | Molecule 635  | -10.2                  | 9.1984                            | -10.4                  | 5.144                             |
| 17  | Molecule 641  | -100.                  | 10.3563                           | -9.6                   | 10.3994                           |
| 18  | Molecule 706  | -10.1                  | 7.3484                            | -10.1                  | 5.5682                            |
| 19  | Molecule 718  | -10.1                  | 10.1                              | -9.6                   | 6.004                             |
| 20  | Molecule 1045 | -100.                  | 5.8396                            | -10.1                  | 4.3985                            |
| 21  | Molecule 1144 | -10.2                  | 7.5191                            | -10.2                  | 5.4218                            |
| 22  | Molecule 1307 | -10.1                  | 7.1311                            | -10.2                  | 5.6322                            |
| 23  | Molecule 1492 | -10.5                  | 7.8535                            | -10.5                  | 5.2136                            |
| 24  | Molecule 1699 | -10.3                  | 7.2066                            | -10.3                  | 5.3646                            |
| 25  | Molecule 1741 | -10.1                  | 8.4732                            | -10.5                  | 6.0471                            |
| 26  | Molecule 1774 | -10.1                  | 8.4087                            | -9.9                   | 8.8457                            |
| 27  | Molecule 1850 | -10.0                  | 7.4103                            | -10.0                  | 5.6763                            |
| 28  | Molecule 1882 | -10.1                  | 7.9807                            | -10.3                  | 5.4146                            |
| 29  | Molecule 1962 | -10.2                  | 6.402                             | -10.2                  | 5.0007                            |
| 30  | Molecule 1993 | -10.0                  | 7.8189                            | -10.0                  | 5.8829                            |
| 31  | Molecule 2041 | -10.3                  | 8.1984                            | -10.0                  | 5.8669                            |
| 32  | Molecule 2056 | -11.4                  | 8.097                             | -11.5                  | 6.2311                            |
| 33  | Molecule 2123 | -10.1                  | 6.429                             | -10.3                  | 4.6542                            |
| 34  | Molecule 2155 | -10.0                  | 6.938                             | -10                    | 5.9778                            |
| 35  | Molecule 2445 | -10.5                  | 6.9522                            | -10.7                  | 5.9317                            |
| 36  | Molecule 2502 | -11.1                  | 7.4807                            | -11.2                  | 5.8633                            |
| 37  | Molecule 2726 | -10.2                  | 6.5302                            | -10.9                  | 5.4972                            |
| 38  | Molecule 2757 | -10.0                  | 7.0276                            | -10                    | 7.0984                            |
| 39  | Molecule 2795 | -11.0                  | 8.0444                            | -11.7                  | 6.0793                            |

|    |               |       |        |       |        |
|----|---------------|-------|--------|-------|--------|
| 40 | Molecule 2924 | -10.0 | 7.1043 | -9.9  | 5.6967 |
| 41 | Molecule 3049 | -10.1 | 6.4071 | -10.0 | 5.2882 |
| 42 | Molecule 3132 | -10.3 | 7.7894 | -10.4 | 5.9773 |
| 43 | Molecule 3281 | -10.2 | 6.508  | -10.0 | 5.7875 |
| 44 | Molecule 3295 | -10.6 | 8.8363 | -11.1 | 6.0218 |
| 45 | Molecule 3348 | -10.1 | 7.7608 | -10.0 | 6.065  |
| 46 | Molecule 3444 | -10.0 | 8.7177 | -9.4  | 4.6901 |
| 47 | Molecule 3591 | -10.1 | 6.1478 | -10.1 | 6.061  |
| 48 | Molecule 3620 | -10.1 | 7.6907 | -10.4 | 5.9181 |
| 49 | Molecule 3693 | -10.0 | 6.9968 | -10.2 | 5.8291 |
| 50 | Molecule 3967 | -10.0 | 7.2818 | -9.9  | 5.0991 |
| 51 | Molecule 3999 | -10.0 | 7.1002 | -9.8  | 5.2439 |
| 52 | Molecule 4080 | -10.0 | 7.1539 | -10.4 | 5.8426 |
| 53 | Molecule 4139 | -10.0 | 7.165  | -9.6  | 4.0781 |
| 54 | Molecule 4226 | -10.2 | 7.7764 | -9.9  | 5.0197 |
| 55 | Molecule 4797 | -10.1 | 7.0397 | -10.7 | 6.1401 |
| 56 | Molecule 4979 | -10.5 | 7.8132 | 10.2  | 6.2463 |
| 57 | Molecule 5168 | -10.1 | 7.0995 | -10.4 | 5.7246 |
| 58 | Molecule 5217 | -10.1 | 6.9763 | -10.0 | 6.1365 |
| 59 | Molecule 5373 | -10.3 | 7.2192 | -10.2 | 6.0313 |
| 60 | Molecule 5561 | -10.2 | 6.6403 | -10.3 | 5.4534 |
| 61 | Molecule 5805 | -10.2 | 7.1412 | -10.2 | 5.5468 |
| 62 | Molecule 5839 | -10.0 | 6.5462 | -9.9  | 6.4024 |
| 63 | Molecule 5945 | -10.2 | 7.933  | -10.0 | 6.6689 |
| 64 | Molecule 6031 | -10.2 | 7.928  | -10.3 | 5.9059 |
| 65 | Molecule 6194 | -12.7 | 8.2459 | -11.4 | 6.0753 |
| 66 | Molecule 6220 | -10.0 | 7.547  | -10.3 | 5.9833 |
| 67 | Molecule 6239 | -10.0 | 7.63   | 10.1  | 6.1133 |
| 68 | Molecule 6240 | -10.0 | 6.9929 | -10.1 | 6.4038 |
