# Supplementary figures and images for: Design of bisamide inhibitors of the TASK-1 potassium channel in silico
Source: Royal Society of Chemistry journal article supplement (doi:10.1039/d4cp03521f), 2024-12-09

a

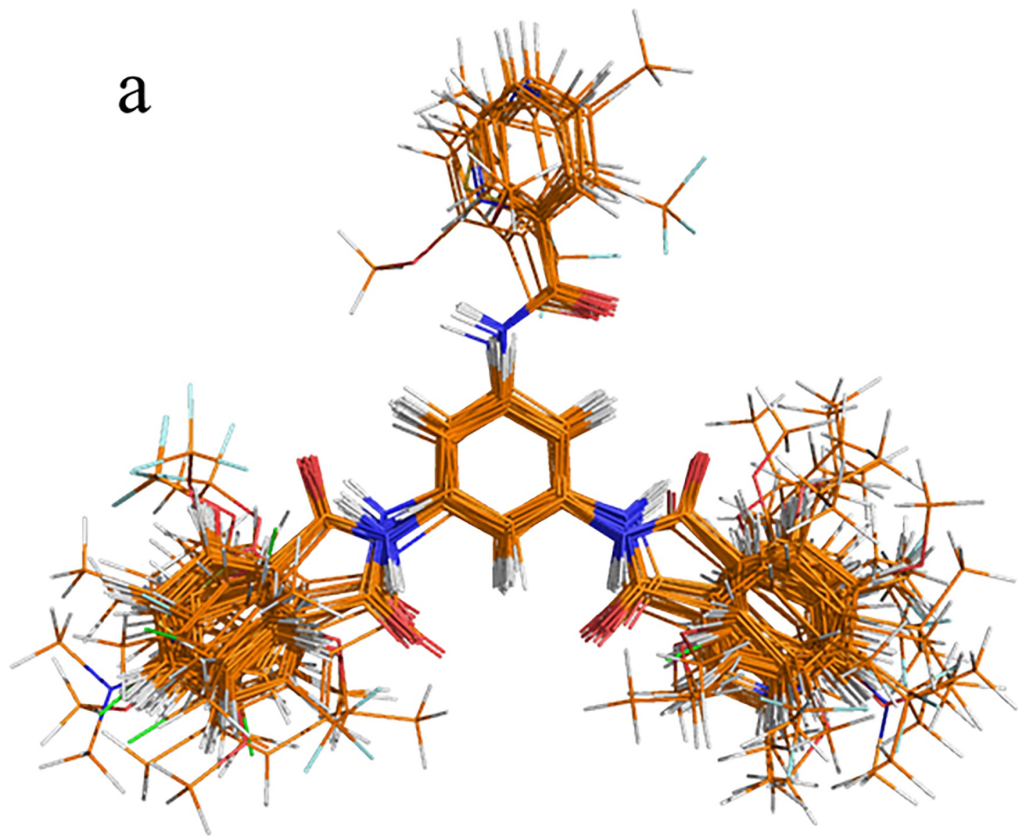

b

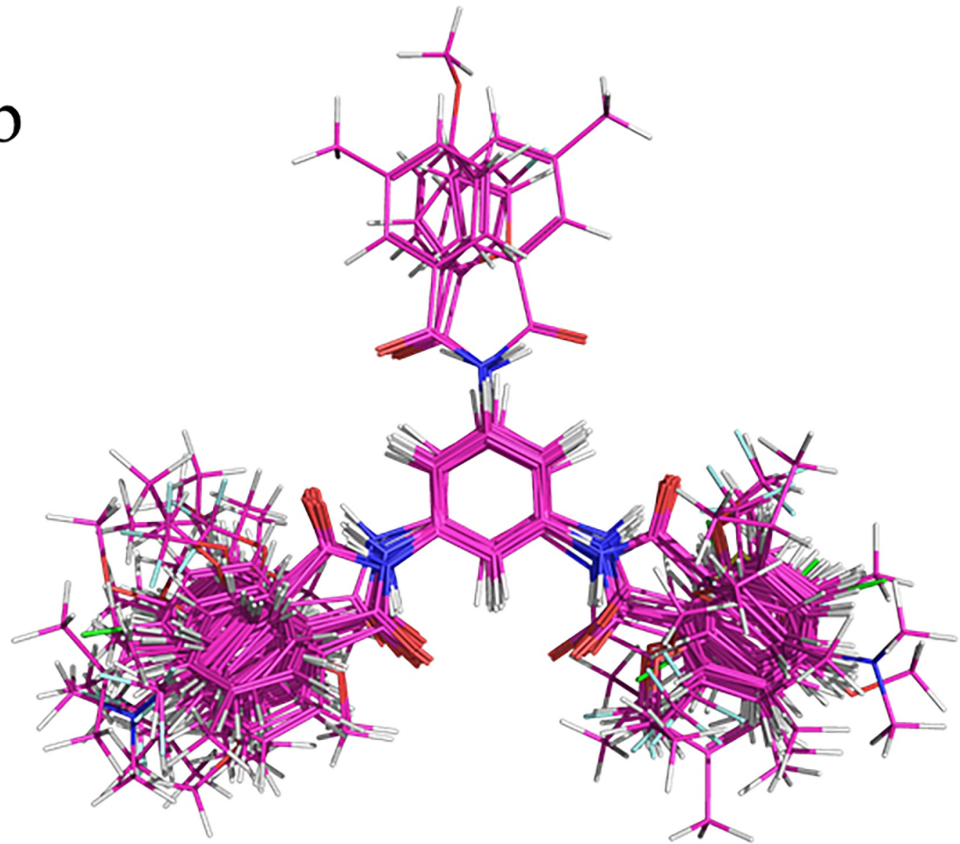

Supplement: d4cp03521f1.pdf [file d4cp03521f1.pdf]
